# Supplementary material for: Isolation of Bacillus amyloliquefaciens JK6 and identification of its lipopeptides surfactin for suppressing tomato bacterial wilt
Source: Royal Society of Chemistry journal article supplement (doi:10.1039/c5ra13142a), 2015-01-01
Supplement: c5ra13142a1.pdf [file c5ra13142a1.pdf]

**Supporting information in this study**

**Table S1**

PCR identification of lipopeptides antibiotic biosynthesis genes from JK6

| Antibiotic | primer | Sequence(5'-3')           | Target gene                              | Size (bp) | GenBank accession number |
|------------|--------|---------------------------|------------------------------------------|-----------|--------------------------|
| Yndj       | 147F   | CAGAGCGACAGCAATCACAT      | <i>yndJ</i> [Joshi and Gardener (2006)]  | 214       | KR149336                 |
|            | 147R   | TGAATTTTCGGTCCGCTTATC     |                                          |           |                          |
| fengycin   | FNDF1  | CCTGCAGAAGGAGAAGTGAA<br>G | <i>fenD</i> [Joshi and Gardener (2006)]  | 288       | KR149329                 |
|            | FNDR1  | TGCTCATCGTCTTCCGTTTC      |                                          |           |                          |
| Iturin     | ITUCF1 | TTCACTTTTGATCTGGCGAT      | <i>ituC</i> [Joshi and Gardener (2006)]  | 541       | KR149332                 |
|            | ITUCR3 | CGTCCGGTACATTTTCAC        |                                          |           |                          |
|            | bamB1F | AAGAAGGCGTTTTTCAAGCA      |                                          |           |                          |
|            | bamB1R | CGACATACAGTTCTCCCGGT<br>R | <i>ituB</i> [Cao (2012)]                 | 511       | KR149331                 |
|            | ituA1F | TGCCAGACAGTATGAGGCAG      | <i>ituA</i> [Cao (2012)]                 | 840       | KR149330                 |
|            | ituA1R | CATGCCGTATCCACTGTGAC      |                                          |           |                          |
|            | ituD2F | GATGCGATCTCCTTGGATGT      | <i>ituD</i> [Joshi and Gardener (2006)]  | 631       | KR149333                 |
|            | ituD2R | ATCGTCATGTGCTGCTTGAG      |                                          |           |                          |
| Surfactin  | 110F   | GTTCTCGCAGTCCAGCAGAA<br>G | <i>srfAB</i> [Joshi and Gardener (2006)] | 278       | KR149335                 |
|            | 110R   | GCCGAGCGTATCCGTACCGA<br>G |                                          |           |                          |

**Table S2**

The Genes demonstrating highest similarity to the sequenced products acquired from PCR amplicons from biosynthetic genes.

| Primer name   | Isolate                          | Match with proper genes by BlastN | GenBank accession numbers of matching genes | Evalue of BlastN | Identify of corresponding gene by BlastN (%) |
|---------------|----------------------------------|-----------------------------------|---------------------------------------------|------------------|----------------------------------------------|
| 110F/110R     | <i>B.amyloliquefaciens</i> FZB42 | <i>srfAB</i>                      | CP000560.1                                  | 7e-139           | 96                                           |
| 147F/147R     | <i>B.amyloliquefaciens</i> FZB42 | <i>Yndj</i>                       | CP000560.1                                  | 5e-89            | 95                                           |
| FNDF1/FNDR1   | <i>B.subtilis</i> GB03           | <i>fenD</i>                       | DQ011335.1                                  | 3e-132           | 98                                           |
| ITUCF1/ITUCR3 | <i>B.amyloliquefaciens</i> B946  | <i>ituC</i>                       | HE617159.1                                  | 0.0              | 99                                           |
| ItuA1F/ItuA1R | <i>B.amyloliquefaciens</i> FZB42 | <i>BmyA</i>                       | CP000560.1                                  | 0.0              | 97                                           |
| ItuD2F/ItuD2R | <i>B.amyloliquefaciens</i> FZB42 | <i>ituD</i>                       | CP000560.1                                  | 0.0              | 97                                           |

---

|                   |                                            |             |            |     |    |
|-------------------|--------------------------------------------|-------------|------------|-----|----|
| bamB1F/bamB1<br>R | <i>B.amyloliquefaci</i><br><i>ens</i> B946 | <i>bamD</i> | HE617159.1 | 0.0 | 99 |
|-------------------|--------------------------------------------|-------------|------------|-----|----|

---
